# Supplementary material for: Expression and prognostic analyses of SCAMPs in pancreatic adenocarcinoma
Source: PubMed Central journal article supplement (PMC7906166; doi:10.18632/aging.202377), 2021-01-20
Supplement: aging-13-202377-s002.pdf [file aging-13-202377-s002.pdf]

## SUPPLEMENTARY TABLE

Supplementary Table 1. The most significant genes-Top 10 correlated with SCAMPs 1 and 5 by cBioPortal.

| SCAMP1   |                 |                        | SCAMP5   |                 |                        |          |
|----------|-----------------|------------------------|----------|-----------------|------------------------|----------|
|          | Correlated gene | Spearman's correlation | p-Value  | Correlated gene | Spearman's correlation | p-Value  |
| POSITIVE | TMED7           | 0.741659               | 1.62E-32 | BEX1            | 0.785973               | 8.28E-39 |
|          | COL4A3BP        | 0.736721               | 6.78E-32 | OGDHL           | 0.775737               | 3.15E-37 |
|          | PJA2            | 0.717279               | 1.41E-29 | RUNDC3A         | 0.755899               | 2.16E-34 |
|          | PPM1A           | 0.717126               | 1.46E-29 | CHGA            | 0.751231               | 9.19E-34 |
|          | TNPO1           | 0.716946               | 1.53E-29 | AMER3           | 0.749632               | 1.50E-33 |
|          | UBL3            | 0.710301               | 8.57E-29 | TMEM63C         | 0.744419               | 7.18E-33 |
|          | TMEM167A        | 0.698749               | 1.52E-27 | KCNJ11          | 0.743529               | 9.34E-33 |
|          | C5ORF24         | 0.687555               | 2.17E-26 | ABCC8           | 0.741569               | 1.66E-32 |
|          | BDP1            | 0.684726               | 4.18E-26 | SCGN            | 0.741037               | 1.94E-32 |
|          | AKAP11          | 0.682395               | 7.12E-26 | DUSP26          | 0.740452               | 2.31E-32 |
| NEGATIVE | DAZAP1          | -0.67272               | 6.16E-25 | TGIF1           | -0.57208               | 6.01E-17 |
|          | CYBC1           | -0.65368               | 3.43E-23 | NDE1            | -0.54588               | 2.73E-15 |
|          | PFN1            | -0.64466               | 2.09E-22 | HRH1            | -0.53127               | 1.99E-14 |
|          | BCL2L12         | -0.634                 | 1.63E-21 | MET             | -0.52996               | 2.37E-14 |
|          | GALK1           | -0.6296                | 3.73E-21 | FAM83D          | -0.50956               | 3.23E-13 |
|          | IKBKG           | -0.62792               | 5.09E-21 | ECT2            | -0.50923               | 3.36E-13 |
|          | RHOG            | -0.62117               | 1.75E-20 | TEAD3           | -0.50606               | 4.96E-13 |
|          | RPS6KB2         | -0.61867               | 2.74E-20 | CDC25C          | -0.50488               | 5.73E-13 |
|          | ALDH16A1        | -0.61025               | 1.21E-19 | TFAP2A          | -0.49735               | 1.42E-12 |
|          | RPLP1           | -0.60608               | 2.48E-19 | TRIM59          | -0.49657               | 1.56E-12 |

The most significant genes-Top 10 correlated with SCAMPs 1 and 5 by cBioPortal.
